# Supplementary material
Source: Research Square preprint supplement (doi:10.21203/rs.3.rs-9244926/v1)
Supplement: Supplementary file 1 [file 0b4784673120e09097ec69c7.docx]

**Multi-Analytical Investigation of the Frescoes in the Hypogean Monumental Complex of Santa Maria della Grotta (Marsala, Italy): Materials, Techniques and State of Conservation**

*Chiara Tuccio a,b, Francesco Armetta a,c, Rosina Celeste Ponterio c,*

*Dario Giuffrida c, Maria Luisa Saladino a,c,**

a Department of Biological, Chemical and Pharmaceutical Sciences and Technologies (STEBICEF)-University of Palermo, Viale delle Scienze, Bld.17, Palermo I-90128, Italy.

b Department of Cultures and Societies, University of Palermo, Viale delle Scienze, Bld.15, Palermo I-90128, Italy

c National Research Council, Institute for Chemical and Physical Processes (CNR-IPCF), Viale Ferdinando Stagno d’Alcontres 37, I-98158 Messina, Italy

Corresponding author: marialuisa.saladino@unipa.it

Tab.S1 Salts analyzed and identification.

| Sampling Area- Salts | |
| --- | --- |
| 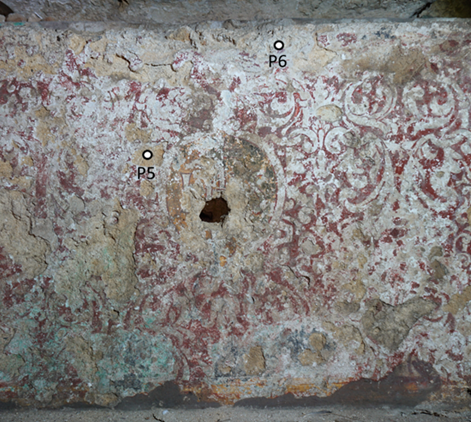  Altar – San Marco Evangelista | 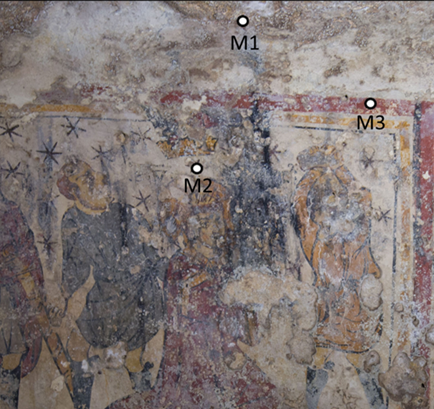  Il Martirio di Santo Stefano |
| 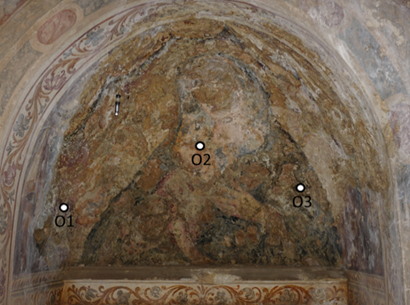  La Madonna Odigitra | 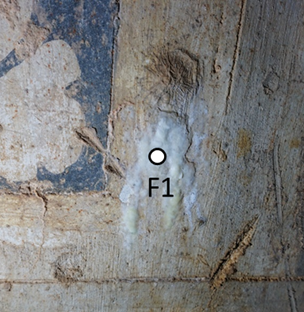  Cornice- La Madonna Odigitria |

Tab. S2 The elements identified by XRF and Raman for each area investigated, together with the pigment hypothesis.

| Points investigated by XRF and/or Raman spectrospcopy | |
| --- | --- |
| 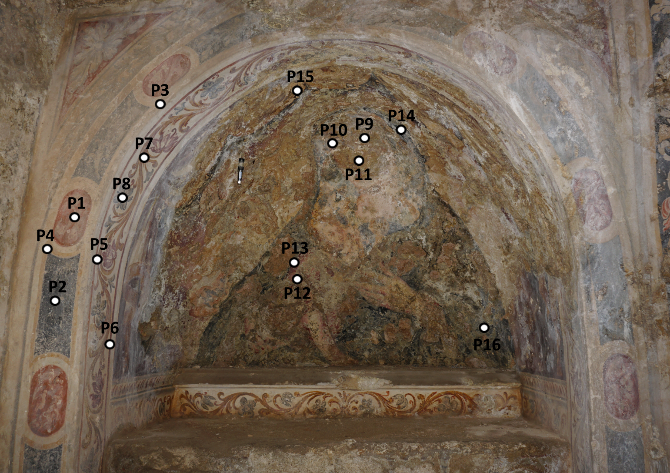  La Madonna Odigitra | 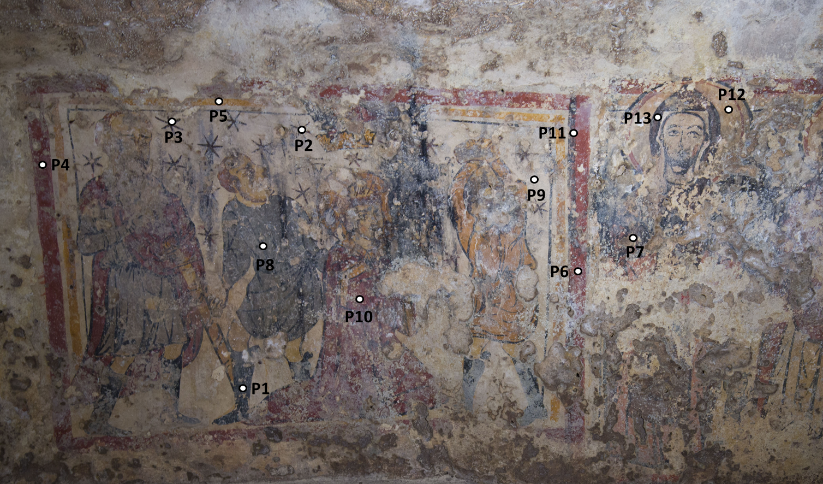  Il Martirio di Santo Stefano |
| 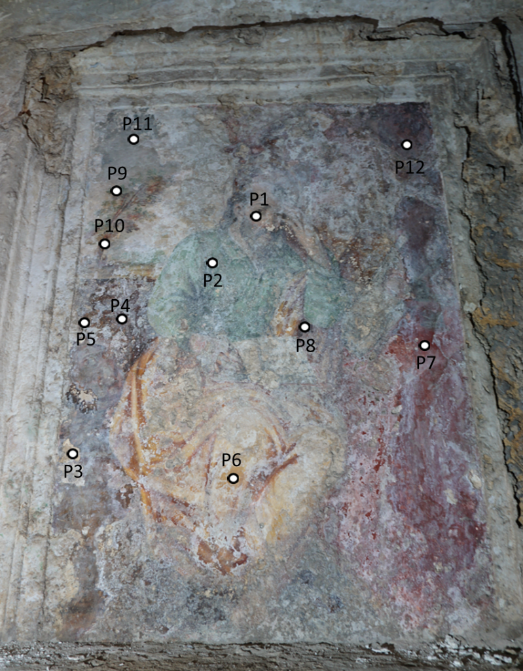  San Marco Evangelista | 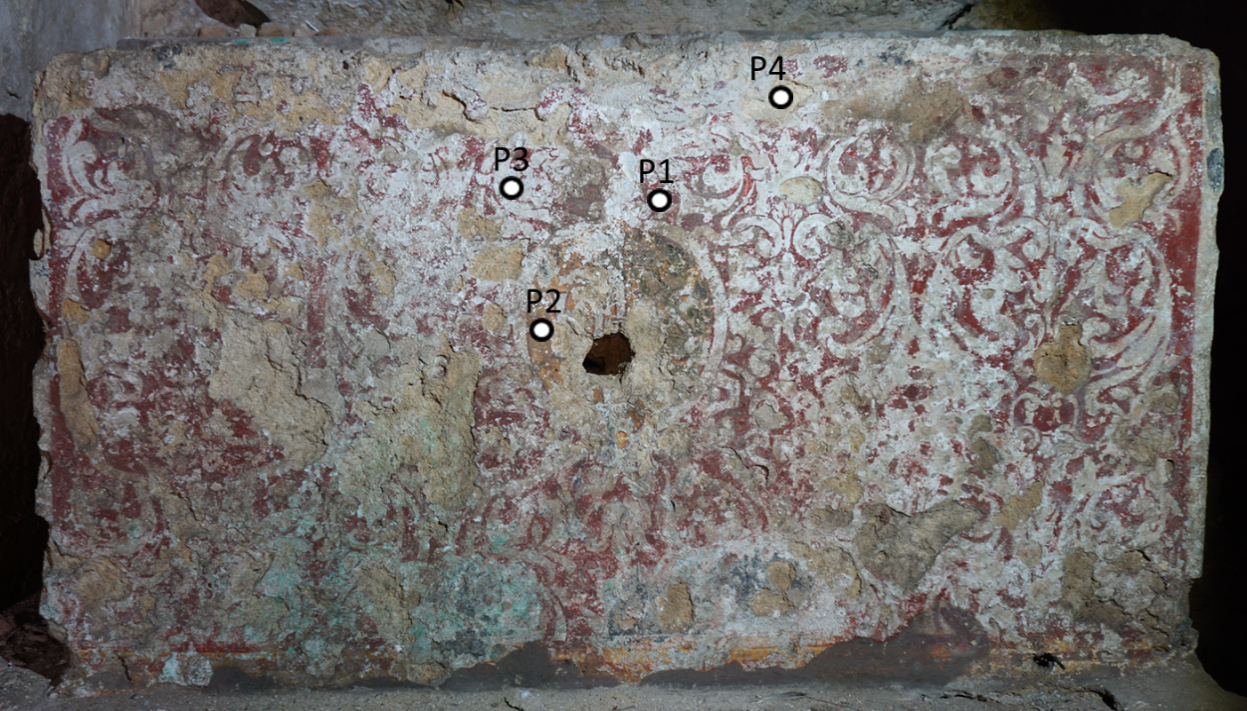  San Marco evangelista-Altar |
| 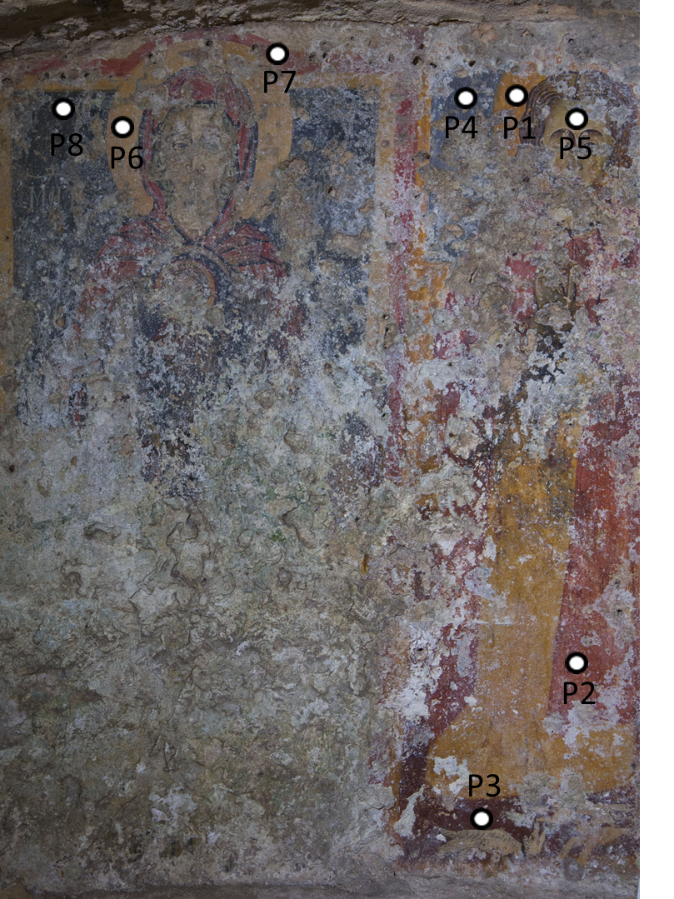  Vergine e San Vito | 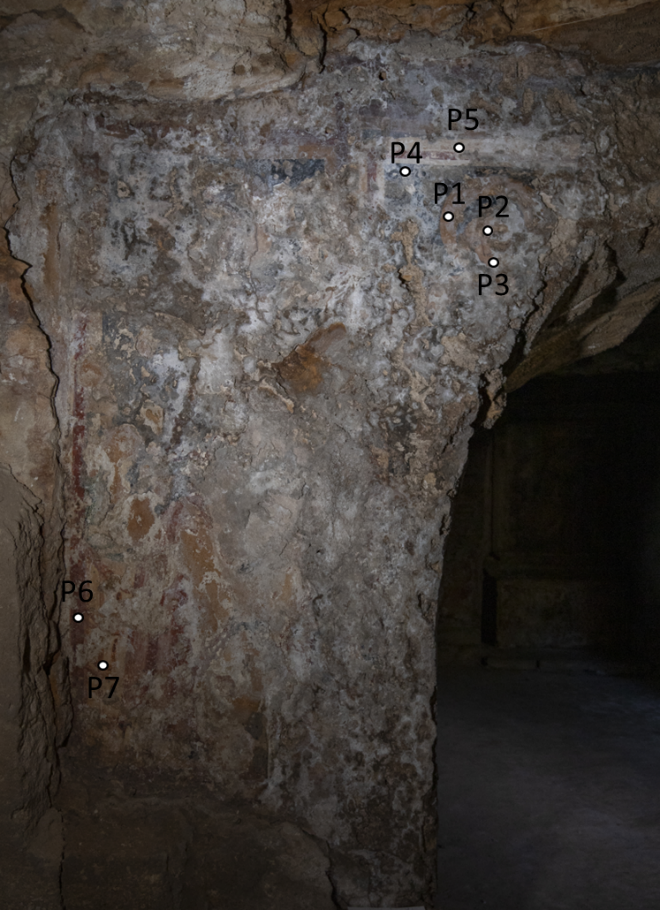  Odigitria e San Gabriele Arcangelo |
| 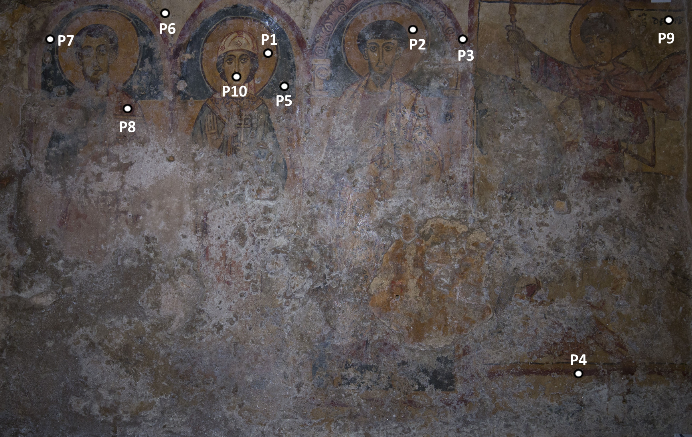  La Teoria dei Santi | 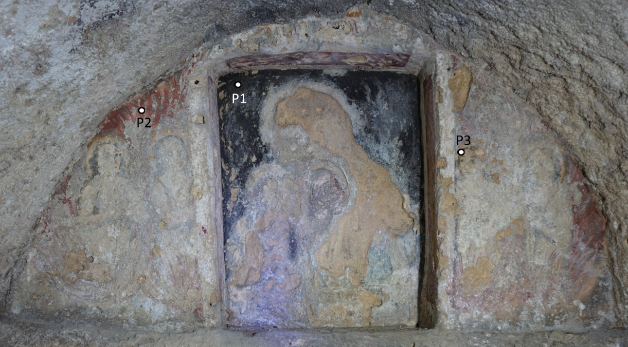  Madonna Odigitria tra anime purganti |
